# Supplementary material for: Prediction of Interactions between Viral and Host Proteins Using Supervised Machine Learning Methods
Source: PubMed Central journal article supplement (PMC4223108; doi:10.1371/journal.pone.0112034), 2014-11-06

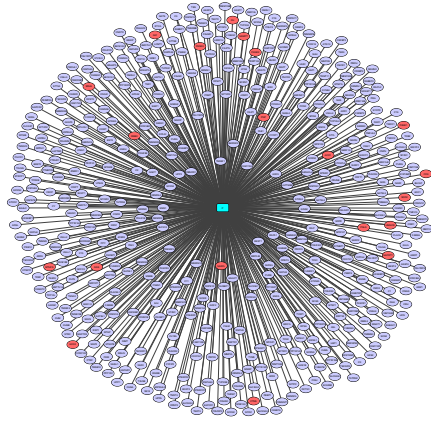

Supplement: pone.0112034.s003.pdf [file pone.0112034.s003.pdf]
